# Alcohol Consumption, One-Carbon Metabolites, Liver Cancer and Liver Disease Mortality

Lauren M. Schwartz<sup>1</sup>\*, E. Christina Persson<sup>1,2</sup>\*, Stephanie J. Weinstein<sup>1</sup>, Barry I. Graubard<sup>1</sup>, Neal D. Freedman<sup>1</sup>, Satu Männistö<sup>3</sup>, Demetrius Albanes<sup>1</sup>, Katherine A. McGlynn<sup>1</sup>\*

**1** Division of Cancer Epidemiology and Genetics, National Cancer Institute, Rockville, Maryland, United States of America, **2** Department of Epidemiology Research, Statens Serum Institut, Copenhagen, Denmark, **3** Department of Chronic Disease Prevention, National Institute for Health and Welfare, Helsinki, Finland

## Abstract

**Background:** Excess alcohol consumption adversely affects one-carbon metabolism and increases the risk of liver disease and liver cancer. Conversely, higher folate levels have been inversely associated with liver damage. The current study investigated the effects of alcohol and one-carbon metabolite intake on liver cancer incidence and liver disease mortality within the Alpha-Tocopherol, Beta-Carotene Cancer Prevention (ATBC) Study.

**Methods:** Cox proportional hazards modeling was used to calculate hazard ratios and 95% confidence intervals (CIs) in a population of 27,086 Finnish males with 194 incident liver cancers and 213 liver disease deaths. In a nested case-control subset (95 liver cancers, 103 controls), logistic regression was used to calculate odds ratios and 95% CIs for serum one-carbon metabolites in relation to liver cancer risk.

**Results:** Daily alcohol consumption of more than 20.44 g was associated with an increased risk of both liver cancer incidence (Hazard Ratio (HR) 1.52, 95%CI 1.06–2.18) and liver disease mortality (HR 6.68, 95%CI 4.16–10.71). These risks were unaffected by one-carbon metabolite intake. Similarly, in the case-control study, none of the serum one-carbon metabolites were associated with liver cancer.

**Conclusions:** The current study provided no convincing evidence for a protective association of one-carbon metabolite intake or serum level on the risk of liver cancer or liver disease mortality.

**Citation:** Schwartz LM, Persson EC, Weinstein SJ, Graubard BI, Freedman ND, et al. (2013) Alcohol Consumption, One-Carbon Metabolites, Liver Cancer and Liver Disease Mortality. PLoS ONE 8(10): e78156. doi:10.1371/journal.pone.0078156

**Editor:** Erica Villa, University of Modena & Reggio Emilia, Italy

**Received:** June 14, 2013; **Accepted:** September 17, 2013; **Published:** October 28, 2013

This is an open-access article, free of all copyright, and may be freely reproduced, distributed, transmitted, modified, built upon, or otherwise used by anyone for any lawful purpose. The work is made available under the Creative Commons CC0 public domain dedication.

**Funding:** The study was financially supported by the Intramural Research Program of the National Cancer Institute, NIH. The funders had no role in study design, data collection and analysis, decision to publish, or preparation of the manuscript.

**Competing Interests:** The authors have declared that no competing interests exist.

\* E-mail: mcglynnk@mail.nih.gov

† These authors contributed equally to this work.

## Introduction

Excessive consumption of alcohol is a well-established risk factor for both liver disease and liver cancer [1–5]. Alcohol adversely affects the absorption of one-carbon metabolites, which can affect DNA methylation and lead to genomic instability and modified oncogene expression [6–8]. Folate and other one-carbon metabolites act as essential co-factors in enzymes that catalyze one-carbon transfer reactions [9]. For several cancers, folate and alcohol consumption have been jointly studied with varying results [10–12]. The risk of liver cancer and liver disease associated with one-carbon metabolites and alcohol, however, has not been widely investigated. Recently, a study by our group suggested that the effect of alcohol on increased risk of liver cancer incidence may be ameliorated by folate consumption [13].

The present study sought to assess the effect of alcohol consumption and one-carbon metabolite (folate, cysteine, vitamin B6, riboflavin, vitamin B12, and methionine) intake on liver cancer incidence and liver disease mortality in the Alpha-Tocopherol, Beta-Carotene Cancer Prevention (ATBC) Study.

In addition, a nested case-control study examined the effects of serum levels of one-carbon metabolite levels and alcohol consumption on the development of liver cancer.

## Materials and Methods

### Ethics Statement

Written informed consent was provided by all study participants. The study was approved by the institutional reviews boards of the National Cancer Institute, Bethesda, Maryland, U.S., and the National Public Health Institute, Helsinki, Finland.

### Study Population

As previously described, the ATBC Cancer Prevention Study was conducted in Finland as a joint project between the U.S. National Cancer Institute and the National Public Health Institute of Finland [14]. It was a randomized, double-blinded, placebo-controlled, primary prevention trial to determine whether daily supplementation with *dl*- $\alpha$ -tocopherol acetate (50 mg/day), *all-trans*- $\beta$ -carotene (20 mg/day), or both, would reduce the incidence

of lung or other cancers in male smokers. Men ( $n = 29,133$ ) between the ages of 50 and 69 years living in southwestern Finland were recruited between the years 1985 and 1988 and assigned to 1 of 4 groups in a  $2 \times 2$  factorial design. The intervention ended on April 30, 1993, however cancer ascertainment via the Finnish Cancer Registry is still ongoing.

Incident liver cancer cases ( $n = 208$ ) diagnosed through December 31, 2009 were identified through the Finnish Cancer Registry using topography code 155 of the 9<sup>th</sup> revision of the International Classification of Diseases (ICD). Liver disease deaths ( $n = 239$ ) through December 31, 2009 were identified via the Finnish Register of Causes of Death using code 571 for ICD-8 and ICD-9 and codes K70-K77 for ICD-10. Eight participants who developed incident liver cancer but died of liver disease were only included in the liver cancer analysis. After excluding individuals with missing questionnaire data and 28 men with self-reported history of cirrhosis at baseline, 194 incident liver cancer cases and 213 liver disease deaths were available for analysis in a cohort of 27,086 persons.

Within the nested case-control study, incident liver cancer cases were diagnosed through April 30, 2002. Cases were matched 1:1 with controls who were alive and free of cancer at the time the case was identified. The matching factors were age (within 5 years) and date of serum draw (within 30 days). After excluding missing questionnaire data and serum data, 95 cases and 103 controls were available for analysis.

### Questionnaire data

At baseline, all participants completed a general risk factor questionnaire which included queries concerning vitamin supplement use. Participants also completed a food-frequency questionnaire (FFQ) to measure usual dietary consumption within the past 12 months. The FFQ was completed by 93% of study participants. The reproducibility and validity have been previously reported [15]. Metabolite intake was estimated using food composition data from the National Public Health Institute. Total intake for each one-carbon metabolite was calculated as energy-adjusted dietary intake using the residual method plus supplemental intake [16].

### Serum one-carbon metabolite measurements

Study participants provided fasting blood samples prior to intervention-arm randomization. The serum samples were stored at  $-70^{\circ}\text{C}$  prior to analysis in 2005–2006. Serum levels of folate and vitamin B12 were determined by radioimmunoassay (Bio-Rad Laboratories, Richmond, CA, USA) in the laboratory of Dr. Jacob Selhub at Tufts University, Boston, MA. The principal active form of vitamin B6, pyridoxal 5'-phosphate, was determined using the tyrosine decarboxylase apoenzyme method [17] while cysteine and homocysteine concentrations were measured using high-performance liquid chromatography (HPLC) [18]. Riboflavin was measured using HPLC with fluorimetric detection [19]. Each batch contained matched case-control pairs which placed beside one another in random order. Six blinded quality control samples which were derived from a pool of serum were also included in each batch. Within-batch coefficients of variation, based on 150 QC samples, were calculated using nested components of variance analysis on logarithmically transformed quality control data [20]. The coefficients of variation were 6.2% for folate, 4.5% for vitamin B6, 7.1% for vitamin B12, 6.3% for cysteine, 4.8% for riboflavin, and 6.2% for homocysteine.

Hepatitis B virus (HBV) status was determined by testing for the presence of hepatitis B surface antigen (HBsAg) using an enzyme immunoassay (Bio-Rad Laboratories, Redmond, WA). Hepatitis C virus (HCV) status was determined by testing for antibody to HCV

(anti-HCV) using an enzyme-linked immunosorbent assay (Ortho-Clinical Diagnostics, Raritan, NJ).

### Statistical analyses

Categorization of folate, cysteine, vitamin B6, riboflavin, vitamin B12, methionine, and alcohol was based on the total adjusted intake at baseline divided into tertiles within the entire cohort. Cox proportional hazards regression models were used to calculate hazard ratios (HRs) and 95% Confidence Intervals (CIs). Models were adjusted for age (continuous age at randomization), education ( $<12$  years,  $\geq 12$  years), smoking ( $<30$  pack-years,  $30-43$  pack-years,  $>43$  pack-years), body mass index (BMI) ( $<25$  kg/m<sup>2</sup>,  $25-29$  kg/m<sup>2</sup>,  $\geq 30$  kg/m<sup>2</sup>), diabetes (yes, no) and study arm ( $\alpha$ -tocopherol,  $\beta$ -carotene, both, neither). In addition, HRs were calculated for the relationship between alcohol consumption and liver cancer and liver disease, stratified by tertiles of one-carbon metabolite intake. Likelihood ratio tests for interaction across tertiles of one-carbon metabolite consumption were computed based on cross-product terms with alcohol use. Tests for trend were calculated by assigning each participant the median value within each tertile and entering that value as a continuous variable in the adjusted multivariate model.

In the nested case-control analysis, serum levels of folate, cysteine, vitamin B6, riboflavin, vitamin B12, homocysteine and alcohol consumption were divided into tertiles and median levels, based on the controls. Both conditional and unconditional logistic regression models were used to determine odds ratios (ORs) and 95% CIs for the associations between alcohol and one-carbon metabolites and liver cancer incidence. The models were adjusted for study arm, age, HBV and HCV. In addition, ORs were calculated for median alcohol intake and serum one-carbon metabolite level in an interaction analysis adjusting for study arm, HBV and HCV. Pearson correlation coefficients between the serum levels and intake levels of the one-carbon metabolites were also calculated.

The proportional hazard assumption was verified using a time interaction model. Statistical significance was set at  $P < 0.05$  based on two-sided tests. All statistical analyses were performed using SAS version 9.2 (SAS Institute Inc, Cary, North Carolina).

### Results

The population characteristics of the study participants by tertile of each one-carbon metabolite and alcohol consumption are shown in **Table 1**. Persons in the highest tertile of alcohol consumption had greater BMI, more years of education and had accumulated more pack-years of smoking. Persons in the highest tertiles of one-carbon metabolite intake had greater BMI and were more likely to have diabetes.

**Table 2** shows the results of the analysis examining the effects of alcohol and one-carbon metabolite intake on liver cancer incidence and liver disease mortality. Increasing alcohol intake was associated with increased risk of liver cancer ( $p$ -trend = 0.02) with a significant increased risk in the highest tertile (HR 1.52, 95%CI 1.06–2.18). None of the one-carbon metabolites, however, were significantly associated with liver cancer incidence.

Increasing levels of alcohol intake was also significantly associated with increased risk of liver disease mortality ( $p$ -trend  $< 0.0001$ ). In addition, the highest tertiles of folate (HR 1.42, 95%CI 1.02–1.96), riboflavin (HR 1.60, 95%CI 1.15–2.22) and vitamin B12 (HR 1.65, 95%CI 1.19–2.30) intake were all associated with an increased risk of liver disease mortality. In contrast, cysteine intake was inversely, but not significantly,

**Table 1.** Distribution of select baseline characteristics across total one-carbon metabolite intake tertiles and alcohol consumption in the ATBC Study.

|                                   | N    | BMI, kg/m <sup>2</sup> (%) |       |       | Education, years (%) |       | Diabetes (%) |      | Pack-Years (%) |       |       |
|-----------------------------------|------|----------------------------|-------|-------|----------------------|-------|--------------|------|----------------|-------|-------|
|                                   |      | <25                        | 25–29 | ≥30   | <12                  | ≥12   | No           | Yes  | <30            | 30–43 | >43   |
| <b>Alcohol Intake (grams/day)</b> |      |                            |       |       |                      |       |              |      |                |       |       |
| 0–5.33                            | 8922 | 41.34                      | 45.02 | 13.56 | 94.23                | 5.77  | 95.45        | 4.55 | 8.20           | 42.57 | 49.23 |
| 5.33–20.44                        | 9119 | 38.38                      | 46.62 | 14.97 | 92.09                | 7.91  | 96.03        | 3.97 | 9.10           | 35.39 | 55.51 |
| >20.44                            | 9045 | 35.77                      | 47.29 | 16.88 | 90.58                | 9.42  | 95.91        | 4.09 | 10.55          | 24.51 | 64.94 |
| <b>Folate (µg)</b>                |      |                            |       |       |                      |       |              |      |                |       |       |
| <304.87                           | 9017 | 41.74                      | 45.19 | 13.04 | 95.30                | 4.70  | 97.38        | 2.62 | 10.17          | 28.30 | 61.53 |
| 304.87 – 355.97                   | 9023 | 38.22                      | 46.70 | 15.04 | 93.62                | 6.38  | 96.08        | 3.92 | 9.12           | 34.98 | 55.90 |
| >355.97                           | 9046 | 35.49                      | 47.05 | 17.34 | 87.97                | 12.03 | 93.94        | 6.06 | 8.58           | 39.07 | 52.35 |
| <b>Cysteine (mg)</b>              |      |                            |       |       |                      |       |              |      |                |       |       |
| <1271.03                          | 9018 | 44.17                      | 44.12 | 11.69 | 91.46                | 8.54  | 98.11        | 1.89 | 9.15           | 30.37 | 60.48 |
| 1271.03 – 1419.40                 | 9021 | 38.83                      | 46.91 | 14.22 | 92.32                | 7.68  | 96.93        | 3.07 | 8.26           | 34.91 | 56.83 |
| >1419.40                          | 9047 | 32.46                      | 47.91 | 19.51 | 93.09                | 6.91  | 92.36        | 7.64 | 10.46          | 37.07 | 52.47 |
| <b>Vitamin B6 (mg)</b>            |      |                            |       |       |                      |       |              |      |                |       |       |
| <2.31                             | 9019 | 41.51                      | 45.28 | 13.14 | 94.68                | 5.32  | 97.53        | 2.47 | 10.00          | 32.93 | 57.07 |
| 2.31 – 2.74                       | 9021 | 37.34                      | 46.91 | 15.72 | 93.43                | 6.57  | 96.06        | 3.94 | 9.37           | 34.59 | 56.05 |
| >2.74                             | 9046 | 36.60                      | 46.75 | 16.57 | 88.78                | 11.22 | 93.81        | 6.19 | 8.50           | 34.84 | 56.65 |
| <b>Riboflavin (mg)</b>            |      |                            |       |       |                      |       |              |      |                |       |       |
| <2.64                             | 9020 | 41.22                      | 46.72 | 12.02 | 91.61                | 8.39  | 97.52        | 2.48 | 8.22           | 34.09 | 57.69 |
| 2.64 – 3.19                       | 9019 | 39.02                      | 46.46 | 14.47 | 94.51                | 5.49  | 96.46        | 3.54 | 9.38           | 34.43 | 56.19 |
| >3.19                             | 9047 | 35.22                      | 45.77 | 18.93 | 90.76                | 9.24  | 93.42        | 6.58 | 10.27          | 33.85 | 55.89 |
| <b>Vitamin B12 (µg)</b>           |      |                            |       |       |                      |       |              |      |                |       |       |
| <8.83                             | 9020 | 40.95                      | 45.73 | 13.27 | 94.80                | 5.20  | 96.98        | 3.02 | 9.33           | 36.23 | 54.43 |
| 8.83 – 12.09                      | 9020 | 37.71                      | 46.82 | 15.41 | 92.99                | 7.01  | 95.67        | 4.33 | 9.16           | 34.04 | 56.81 |
| >12.09                            | 9046 | 36.79                      | 46.40 | 16.75 | 89.09                | 10.91 | 94.75        | 5.25 | 9.37           | 32.10 | 58.52 |
| <b>Methionine (mg)</b>            |      |                            |       |       |                      |       |              |      |                |       |       |
| <1841.83                          | 9020 | 44.71                      | 44.04 | 11.22 | 92.88                | 7.12  | 98.12        | 1.88 | 9.61           | 34.81 | 55.58 |
| 1841.83 – 2106.93                 | 9020 | 38.49                      | 46.98 | 14.46 | 92.87                | 7.13  | 96.66        | 3.34 | 8.69           | 34.87 | 56.44 |
| >2106.93                          | 9046 | 32.26                      | 47.92 | 19.74 | 91.12                | 8.88  | 92.63        | 7.37 | 9.56           | 32.69 | 57.75 |

doi:10.1371/journal.pone.0078156.t001

associated with risk ( $p$ -trend = 0.07). Intakes of vitamin B6 and methionine had no association with liver disease mortality.

In addition, interactions between alcohol and one-carbon metabolites were examined for effects on liver cancer incidence and liver disease mortality. None of the interactions were statistically significant (data not shown).

In the nested case-control analysis, the relationships of alcohol consumption and serum one-carbon metabolite levels with liver cancer were examined. As shown in **Table 3**, the results of the unconditional logistic regression analysis found none of the relationships were significant. The conditional logistic regression analysis also found no significant relationships (data not shown). In addition, the interactions between alcohol and serum one-carbon metabolites were examined in relationship to liver cancer, but none were statistically significant (data not shown).

The Pearson correlation coefficients examining the correlation between intake and serum levels one-carbon metabolite levels were all statistically significant except for cysteine (correlation coefficient 0.10,  $p = 0.18$ ), with coefficients ranging from 0.31 for vitamin B6 to 0.64 for vitamin B12.

## Discussion

In the current study, alcohol intake was positively associated with an increased risk of both liver cancer incidence and liver disease mortality, as anticipated. None of the one-carbon metabolites were significantly associated with liver cancer risk, however. Conversely, folate, riboflavin and vitamin B12 intakes were associated with an increased risk of liver disease mortality. The examination of serum levels of one-carbon metabolites in relation to liver cancer found no significant relationships.

One-carbon metabolism, conducted by linked biochemical pathways that involve the interactions of B vitamins, homocysteine and methionine, is critical for the synthesis of both DNA and S-adenosylmethionine, a methyl donor for many reactions including DNA methylation [21]. While folate and methionine are important dietary sources of methyl groups, alcohol is known folate antagonist that can interfere with both folate absorption and metabolism [22,23].

While several experimental animal studies have shown that depleted one-carbon metabolites are associated with hepatocellu-

**Table 2.** Association between alcohol consumption and one-carbon metabolite intake and the risk of liver cancer incidence and liver disease mortality in the ATBC Study.

|                                   | Liver Cancer incidence |           |              |      |           | Liver Disease mortality |           |              |      |            |
|-----------------------------------|------------------------|-----------|--------------|------|-----------|-------------------------|-----------|--------------|------|------------|
|                                   | Cases                  | Non-Cases | Person-Years | HR   | (95% CI)* | Cases                   | Non-Cases | Person-Years | HR   | (95% CI)*  |
| <b>Alcohol Intake (grams/day)</b> |                        |           |              |      |           |                         |           |              |      |            |
| <5.33                             | 53                     | 8869      | 143,397      | 1.00 | Reference | 20                      | 8902      | 143,424      | 1.00 | Reference  |
| 5.33–20.44                        | 64                     | 9055      | 150,334      | 1.20 | 0.83 1.73 | 45                      | 9074      | 150,389      | 2.06 | 1.22 3.50  |
| >20.44                            | 77                     | 8968      | 145,640      | 1.52 | 1.06 2.18 | 148                     | 8897      | 145,694      | 6.68 | 4.16 10.71 |
| <i>P<sub>trend</sub></i>          |                        |           |              |      |           | 0.02 <.0001             |           |              |      |            |
| <b>Folate (µg)</b>                |                        |           |              |      |           |                         |           |              |      |            |
| <304.87                           | 53                     | 8964      | 140,740      | 1.00 | Reference | 63                      | 8954      | 140,770      | 1.00 | Reference  |
| 304.87 – 355.97                   | 67                     | 8956      | 148,253      | 1.21 | 0.84 1.74 | 55                      | 8968      | 148,322      | 0.84 | 0.58 1.20  |
| >355.97                           | 74                     | 8972      | 150,378      | 1.27 | 0.89 1.83 | 95                      | 8951      | 150,414      | 1.42 | 1.02 1.96  |
| <i>P<sub>trend</sub></i>          |                        |           |              |      |           | 0.21 0.02               |           |              |      |            |
| <b>Cysteine (mg)</b>              |                        |           |              |      |           |                         |           |              |      |            |
| <1271.03                          | 73                     | 8945      | 145,643      | 1.00 | Reference | 87                      | 8931      | 145,692      | 1.00 | Reference  |
| 1271.03 – 1419.40                 | 56                     | 8965      | 147,391      | 0.74 | 0.52 1.04 | 61                      | 8960      | 147,429      | 0.70 | 0.50 0.97  |
| >1419.40                          | 65                     | 8982      | 146,337      | 0.76 | 0.54 1.07 | 65                      | 8982      | 146,385      | 0.74 | 0.54 1.03  |
| <i>P<sub>trend</sub></i>          |                        |           |              |      |           | 0.12 0.07               |           |              |      |            |
| <b>Vitamin B6 (mg)</b>            |                        |           |              |      |           |                         |           |              |      |            |
| <2.31                             | 70                     | 8949      | 141,952      | 1.00 | Reference | 63                      | 8956      | 141,997      | 1.00 | Reference  |
| 2.31 – 2.74                       | 48                     | 8973      | 147,539      | 0.66 | 0.46 0.95 | 65                      | 8956      | 147,570      | 0.96 | 0.68 1.36  |
| >2.74                             | 76                     | 8970      | 149,879      | 0.97 | 0.70 1.35 | 85                      | 8961      | 149,940      | 1.21 | 0.87 1.68  |
| <i>P<sub>trend</sub></i>          |                        |           |              |      |           | 0.81 0.20               |           |              |      |            |
| <b>Riboflavin (mg)</b>            |                        |           |              |      |           |                         |           |              |      |            |
| <2.64                             | 64                     | 8956      | 150,318      | 1.00 | Reference | 60                      | 8960      | 150,355      | 1.00 | Reference  |
| 2.64 – 3.19                       | 61                     | 8958      | 146,600      | 0.96 | 0.68 1.36 | 61                      | 8958      | 146,643      | 1.06 | 0.74 1.51  |
| >3.19                             | 69                     | 8978      | 142,454      | 1.03 | 0.73 1.45 | 92                      | 8955      | 142,508      | 1.60 | 1.15 2.22  |
| <i>P<sub>trend</sub></i>          |                        |           |              |      |           | 0.86 0.003              |           |              |      |            |
| <b>Vitamin B12 (µg)</b>           |                        |           |              |      |           |                         |           |              |      |            |
| <8.83                             | 67                     | 8953      | 147,202      | 1.00 | Reference | 56                      | 8964      | 147,239      | 1.00 | Reference  |
| 8.83 –12.09                       | 58                     | 8962      | 145,873      | 0.85 | 0.60 1.22 | 60                      | 8960      | 145,890      | 1.06 | 0.73 1.52  |
| >12.09                            | 69                     | 8977      | 146,296      | 0.96 | 0.69 1.35 | 97                      | 8949      | 146,378      | 1.65 | 1.19 2.30  |
| <i>P<sub>trend</sub></i>          |                        |           |              |      |           | 0.92 0.001              |           |              |      |            |
| <b>Methionine (mg)</b>            |                        |           |              |      |           |                         |           |              |      |            |
| <1841.83                          | 65                     | 8955      | 146,361      | 1.00 | Reference | 75                      | 8945      | 146,398      | 1.00 | Reference  |
| 1841.83 –2106.93                  | 59                     | 8961      | 146,808      | 0.88 | 0.62 1.25 | 66                      | 8954      | 146,833      | 0.86 | 0.62 1.19  |
| >2106.93                          | 70                     | 8976      | 146,202      | 0.95 | 0.67 1.34 | 72                      | 8974      | 146,275      | 0.90 | 0.65 1.24  |
| <i>P<sub>trend</sub></i>          |                        |           |              |      |           | 0.78 0.53               |           |              |      |            |

\*adjusted for age, education, smoking, BMI, diabetes and study arm  
doi:10.1371/journal.pone.0078156.t002

lar carcinoma (HCC) risk, only one human case-control study to date has found serum folate levels to be inversely associated with liver cancer [24]. In addition, an interaction between alcohol consumption and folate intake on risk of HCC has previously been found by our group [13]. The prior study, conducted in the NIH-AARP Diet and Health Study cohort in the United States, suggested that higher folate intake could ameliorate the effect of alcohol consumption on the development of HCC. Those results were not directly replicated in the present study, perhaps due to differences in study populations and overall folate intake. In the NIH-AARP study conducted in the U.S., the tertiles of folate

intake were 1) <419.2 µg/day, 2) 419.2–736.9 µg/day, 3) >736.9 µg/day while in the present study, the tertiles of folate intake were 1) <304.9 µg/day, 2) 304.9–356.0 µg/day, 3) >356.0 µg/day. The notably lower folate intake levels in the ATBC study conducted in Finland may be due to lower folate intake in Finland than in the U.S. In addition, Finland does not practice dietary folate fortification. In contrast, the implementation of the U.S. folate fortification program in 1998 has resulted in increased mean folic acid intakes in the United States of approximately 190 µg/day [25].

**Table 3.** Association between alcohol consumption and one-carbon metabolite serum levels and the risk of liver cancer incidence in the ATBC Study.

|                                   | Cases | Controls | OR   | (95% CI)* |      |
|-----------------------------------|-------|----------|------|-----------|------|
| <b>Alcohol Intake (grams/day)</b> |       |          |      |           |      |
| <4.15                             | 26    | 34       | 1.00 | Reference |      |
| 4.15–13.80                        | 24    | 35       | 0.92 | 0.40      | 2.14 |
| >13.80                            | 45    | 34       | 1.24 | 0.54      | 2.85 |
| <i>P</i> <sub>trend</sub>         | 0.54  |          |      |           |      |
| <b>Folate (nmol/L)</b>            |       |          |      |           |      |
| <3.08                             | 33    | 34       | 1.00 | Reference |      |
| 3.08 – 4.42                       | 34    | 36       | 1.32 | 0.61      | 2.87 |
| >4.42                             | 28    | 33       | 0.82 | 0.43      | 1.92 |
| <i>P</i> <sub>trend</sub>         | 0.65  |          |      |           |      |
| <b>Cysteine (nmol/mL)</b>         |       |          |      |           |      |
| <280.50                           | 29    | 34       | 1.00 | Reference |      |
| 280.50 – 330.48                   | 35    | 35       | 1.17 | 0.52      | 2.61 |
| >330.48                           | 31    | 34       | 1.28 | 0.59      | 2.88 |
| <i>P</i> <sub>trend</sub>         | 0.55  |          |      |           |      |
| <b>Vitamin B6 (pmol/mL)</b>       |       |          |      |           |      |
| <18.58                            | 43    | 34       | 1.00 | Reference |      |
| 18.58 – 30.27                     | 24    | 35       | 0.53 | 0.24      | 1.21 |
| >30.27                            | 28    | 34       | 0.68 | 0.31      | 1.50 |
| <i>P</i> <sub>trend</sub>         | 0.48  |          |      |           |      |
| <b>Riboflavin (pmol/mL)</b>       |       |          |      |           |      |
| <7.16                             | 34    | 34       | 1.00 | Reference |      |
| 7.16 – 9.86                       | 26    | 35       | 0.63 | 0.28      | 1.44 |
| >9.86                             | 35    | 34       | 0.86 | 0.39      | 1.90 |
| <i>P</i> <sub>trend</sub>         | 0.81  |          |      |           |      |
| <b>Vitamin B12 (pmol/L)</b>       |       |          |      |           |      |
| <423.14                           | 31    | 34       | 1.00 | Reference |      |
| 423.14 – 562.67                   | 34    | 35       | 1.31 | 0.58      | 2.96 |
| >562.67                           | 30    | 34       | 0.74 | 0.33      | 1.62 |
| <i>P</i> <sub>trend</sub>         | 0.46  |          |      |           |      |
| <b>Homocysteine (nmol/mL)</b>     |       |          |      |           |      |
| <12.24                            | 32    | 34       | 1.00 | Reference |      |
| 12.24–14.74                       | 23    | 37       | 0.80 | 0.35      | 1.84 |
| >14.74                            | 40    | 32       | 1.52 | 0.69      | 3.36 |
| <i>P</i> <sub>trend</sub>         | 0.22  |          |      |           |      |

\*adjusted for age, education, smoking, BMI, diabetes, study arm, HBV, HCV  
doi:10.1371/journal.pone.0078156.t003

In addition to differences in dietary patterns, smoking and drinking patterns also differed in the NIH-AARP and ATBC

## References

- Schutze M, Boeing H, Pischon T, Rehm J, Kehoe T, et al. (2011) Alcohol attributable burden of incidence of cancer in eight European countries based on results from prospective cohort study. *BMJ* 342: d1584.
- Boffetta P, Hashibe M, La Vecchia C, Zatonski W, Rehm J (2006) The burden of cancer attributable to alcohol drinking. *Int J Cancer* 119: 884–887.
- Dong C, Yoon YH, Chen CM, Yi HY (2011) Heavy alcohol use and premature death from hepatocellular carcinoma in the United States, 1999–2006. *J Stud Alcohol Drugs* 72: 892–902.
- Shimazu T, Sasazuki S, Wakai K, Tamakoshi A, Tsuji I, et al. (2012) Alcohol drinking and primary liver cancer: a pooled analysis of four Japanese cohort studies. *Int J Cancer* 130: 2645–2653.
- Trichopoulos D, Bamia C, Lagiou P, Fedirko V, Trepo E, et al. (2011) Hepatocellular carcinoma risk factors and disease burden in a European cohort: a nested case-control study. *J Natl Cancer Inst* 103: 1686–1695.
- Choi SW, Mason JB (2000) Folate and carcinogenesis: an integrated scheme. *J Nutr* 130: 129–132.
- Kim YI (1999) Folate and carcinogenesis: evidence, mechanisms, and implications. *J Nutr Biochem* 10: 66–88.

studies. All men in the ATBC study smoked 5 or more cigarettes per day at baseline, while in the NIH-AARP study 35% of participants were never smokers. Smokers are known to have lower serum levels of folate, vitamin B6, and vitamin B12, possibly due to a negative effect of components in tobacco smoke on one-carbon metabolism [26–28]. In the ATBC study, 11% of participants were non-drinkers and 11% reported consuming more than three drinks of alcohol per day (42 grams), while in the NIH-AARP cohort 24% of participants reported no alcohol consumption and only 8% reported drinking more than 3 drinks per day. The overall increase in percentage of drinkers and drinkers with greater alcohol consumption may have further decreased levels of one-carbon metabolites.

While intakes of one-carbon metabolites were not associated with the development of liver cancer, intakes of several metabolites were associated with increased risk of liver disease mortality. It is possible that these findings are due to men with existing liver disease at baseline being counseled to increase their intakes of B vitamins to prevent deficiencies associated with liver damage. Although men with cirrhosis were excluded from study participation, other forms of liver disease were not exclusionary criteria.

Strengths of this study include using both a prospective design to examine one-carbon metabolite intake, and a nested case-control design to examine serum levels of one-carbon metabolites. The present study was also able to adjust for HBV and HCV which are known risk factors for liver disease and liver cancer. Study limitations include having a rather small case number, a population restricted to male cigarette smokers and the determination of dietary intake by a food-frequency questionnaire rather than a 24 hour dietary record. In addition, the inclusion of ex-drinkers in the non-drinking category may have biased the estimates toward the null. As a result, caution should be exercised when attempting to extrapolate the results to other populations.

As a prior study in the NIH-AARP cohort found an inverse association between folate intake and risk of hepatocellular carcinoma among alcohol consumers, but the current study did not, further research on the topic is warranted.

## Acknowledgments

The authors thank Dr. Jacob Selhub (Tufts University) for his oversight of the one-carbon biomarker assays.

## Author Contributions

Conceived and designed the experiments: LMS ECP BIG KAM. Performed the experiments: SJW. Analyzed the data: LMS ECP BIG. Contributed reagents/materials/analysis tools: SM. Wrote the paper: LMS ECP SJW BIG NDF SM DA KAM.

8. Stover PJ (2004) Physiology of folate and vitamin B12 in health and disease. *Nutr Rev* 62: S3–12; discussion S13.
9. Friso S, Choi SW (2005) Gene-nutrient interactions in one-carbon metabolism. *Curr Drug Metab* 6: 37–46.
10. Heinen MM, Verhage BA, Ambergen TA, Goldbohm RA, van den Brandt PA (2009) Alcohol consumption and risk of pancreatic cancer in the Netherlands cohort study. *Am J Epidemiol* 169: 1233–1242.
11. Stolzenberg-Solomon RZ, Chang SC, Leitzmann MF, Johnson KA, Johnson C, et al. (2006) Folate intake, alcohol use, and postmenopausal breast cancer risk in the Prostate, Lung, Colorectal, and Ovarian Cancer Screening Trial. *Am J Clin Nutr* 83: 895–904.
12. Ibiebele TI, Hughes MC, Pandeya N, Zhao Z, Montgomery G, et al. (2011) High intake of folate from food sources is associated with reduced risk of esophageal cancer in an Australian population. *J Nutr* 141: 274–283.
13. Persson EC, Schwartz LM, Park Y, Trabert B, Hollenbeck AR, et al. (2013) Alcohol consumption, folate intake, hepatocellular carcinoma, and liver disease mortality. *Cancer Epidemiol Biomarkers Prev* 22: 415–421.
14. The ATBC Cancer Prevention Study Group (1994) The alpha-tocopherol, beta-carotene lung cancer prevention study: design, methods, participant characteristics, and compliance. The ATBC Cancer Prevention Study Group. *Ann Epidemiol* 4: 1–10.
15. Pietinen P, Hartman AM, Haapa E, Rasanen L, Haapakoski J, et al. (1988) Reproducibility and validity of dietary assessment instruments. I. A self-administered food use questionnaire with a portion size picture booklet. *Am J Epidemiol* 128: 655–666.
16. Willett W, Stampfer MJ (1986) Total energy intake: implications for epidemiologic analyses. *Am J Epidemiol* 124: 17–27.
17. Shin-Buehring YS, Stuempfig L, Pouget E, Rahm P, Schaub J (1981) Characterization of galactose-1-phosphate uridylyl-transferase and galactokinase in human organs from the fetus and adult. *Clin Chim Acta* 112: 257–265.
18. Araki A, Sako Y (1987) Determination of free and total homocysteine in human plasma by high-performance liquid chromatography with fluorescence detection. *J Chromatogr* 422: 43–52.
19. Zempleni J, Link G, Kubler W (1992) The transport of thiamine, riboflavin and pyridoxal 5'-phosphate by human placenta. *Int J Vitam Nutr Res* 62: 165–172.
20. Fears TR, Ziegler RG, Donaldson JL, Falk RT, Hoover RN, et al. (2002) Reproducibility studies and interlaboratory concordance for androgen assays of male plasma hormone levels. *Cancer Epidemiol Biomarkers Prev* 11: 785–789.
21. Anderson OS, Sant KE, Dolinoy DC (2012) Nutrition and epigenetics: an interplay of dietary methyl donors, one-carbon metabolism and DNA methylation. *J Nutr Biochem* 23: 853–859.
22. Halsted CH, Villanueva JA, Devlin AM, Chandler CJ (2002) Metabolic interactions of alcohol and folate. *J Nutr* 132: 2367S–2372S.
23. Seitz HK, Stickel F (2007) Molecular mechanisms of alcohol-mediated carcinogenesis. *Nat Rev Cancer* 7: 599–612.
24. Welzel TM, Katki HA, Sakoda LC, Evans AA, London WT, et al. (2007) Blood folate levels and risk of liver damage and hepatocellular carcinoma in a prospective high-risk cohort. *Cancer Epidemiol Biomarkers Prev* 16: 1279–1282.
25. Choumenkovich SF, Selhub J, Wilson PW, Rader JI, Rosenberg IH, et al. (2002) Folic acid intake from fortification in United States exceeds predictions. *J Nutr* 132: 2792–2798.
26. Piyathilake CJ, Macaluso M, Hine RJ, Richards EW, Krumdieck CL (1994) Local and systemic effects of cigarette smoking on folate and vitamin B-12. *Am J Clin Nutr* 60: 559–566.
27. Gabriel HE, Crott JW, Ghandour H, Dallal GE, Choi SW, et al. (2006) Chronic cigarette smoking is associated with diminished folate status, altered folate form distribution, and increased genetic damage in the buccal mucosa of healthy adults. *Am J Clin Nutr* 83: 835–841.
28. Mannino DM, Mulinare J, Ford ES, Schwartz J (2003) Tobacco smoke exposure and decreased serum and red blood cell folate levels: data from the Third National Health and Nutrition Examination Survey. *Nicotine Tob Res* 5: 357–362.
